# Supplementary material for: Improving quantitative control and homogeneous distribution of samples on paper-based analytical devices via drop-on-demand inkjet printing
Source: Royal Society of Chemistry journal article supplement (doi:10.1039/c9an00481e), 2019-01-01
Supplement: c9an00481e1.pdf [file c9an00481e1.pdf]

## *Supplementary Information*

### **Improving quantitative control and homogeneous distribution of sample on paper-based analytical devices via drop-on-demand inkjet printing**

Meng-Meng Liu<sup>a</sup>, Xin Lian<sup>a</sup>, Zi-Zhen Guo<sup>a</sup>, Hui Liu<sup>a</sup>, Yun Lei<sup>a</sup>, Yao Chen<sup>a</sup>, Wei Chen<sup>a</sup>, Xin-Hua Lin<sup>a\*</sup>, Ai-Lin Liu<sup>a\*</sup>, Xing-Hua Xia<sup>b\*</sup>

a. Department of Pharmaceutical Analysis, Higher Educational Key Laboratory for Nano Biomedical Technology of Fujian Province, Faculty of Pharmacy, Fujian Medical University, Fuzhou 350122, China

b. State Key Laboratory of Analytical Chemistry for Life Science, School of Chemistry and Chemical Engineering, Nanjing University, Nanjing 210023, China

---

\*Corresponding author: E-mail: [xhxia@nju.edu.cn](mailto:xhxia@nju.edu.cn), [xh11963@sina.com](mailto:xh11963@sina.com),  
[ailinliu@fjmu.edu.cn](mailto:ailinliu@fjmu.edu.cn).

<sup>1</sup>Meng-Meng Liu and Xin Lian contributed equally to this work.

## Figures

### FigureS1

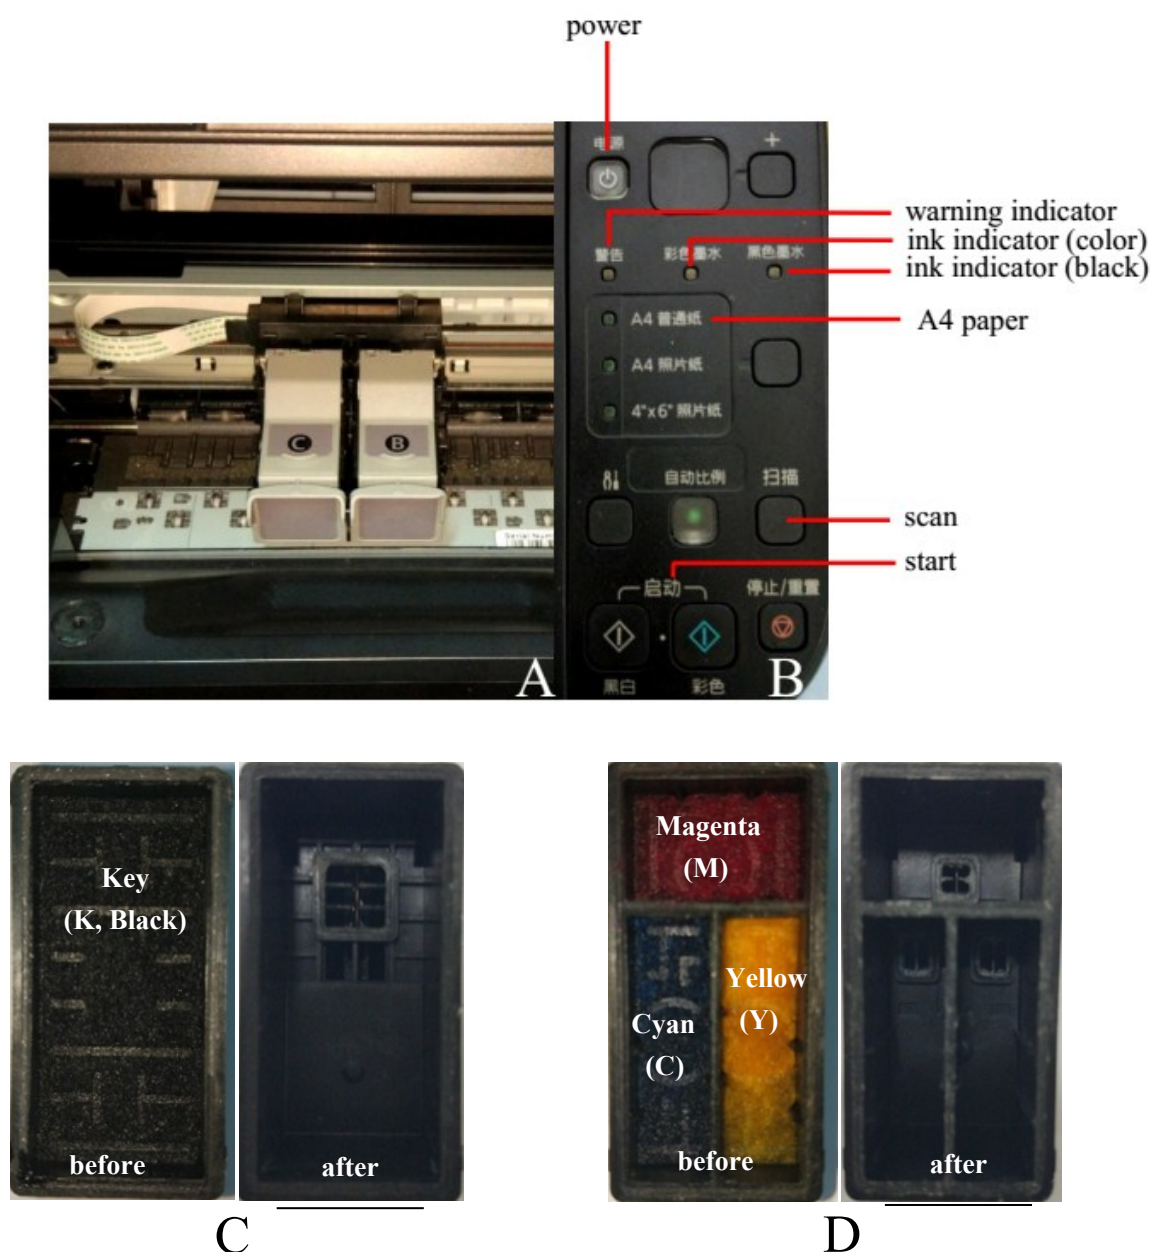

**Fig. S1** Photos for the inside structure (A) and operational panel (B) of a commercial Canon MP288 piezoelectric inkjet printer. Photos of the black cartridge (C) and the color cartridge (D) before (left) and after (right) disassembly.

Black cartridge (PG-815): Key (K, Black); Color cartridge (CL-816): Cyan (C); Yellow (Y) and Magenta (M).

Figure S2

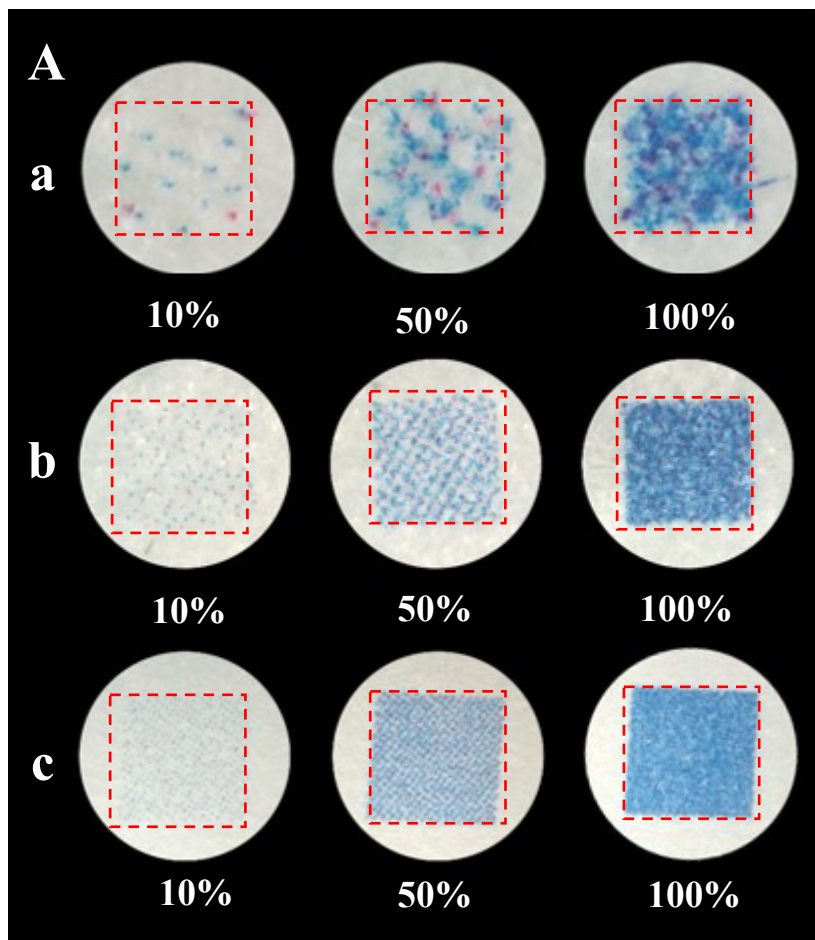

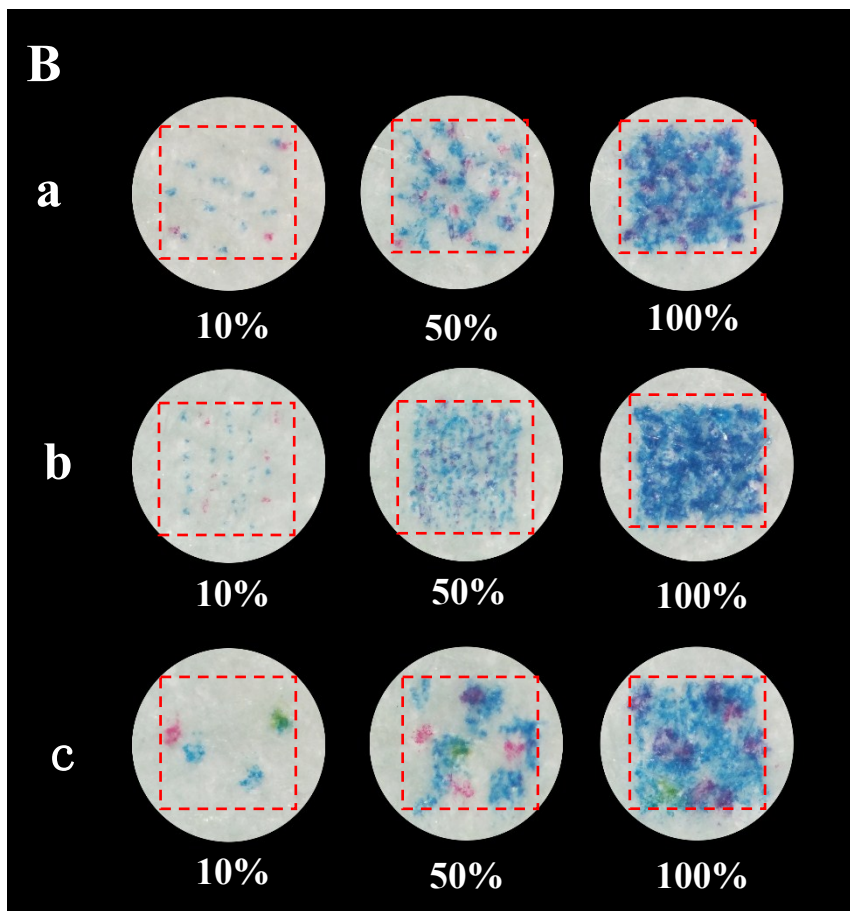

**Fig. S2** Optimization of the printed area and print quality. (A) Optical micrographs of the different printed areas with various magnification. a: 0.25 mm<sup>2</sup> with magnification of 45 times. b: 2.25 mm<sup>2</sup> with magnification of 15 times. c: 9.0 mm<sup>2</sup> with magnification of 7 times. (B) Optical micrographs of the cyan ink dots at C value range from 10 % to 100 % with different print quality. a: Standard printing. b: High-quality printing. c: Fast printing.

Figure S3

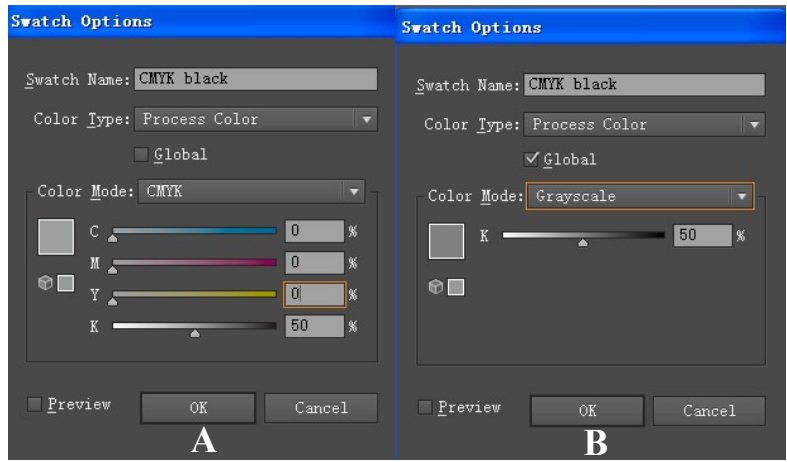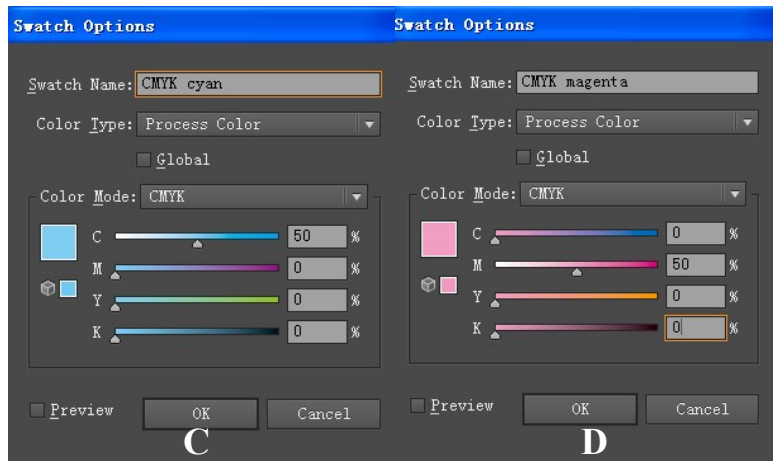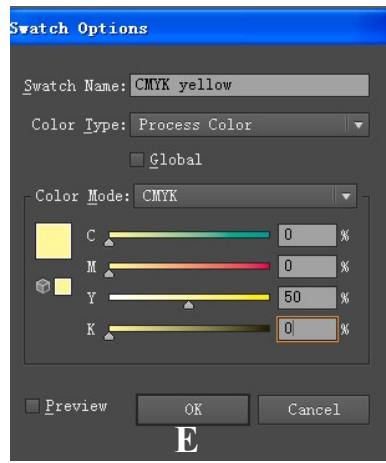

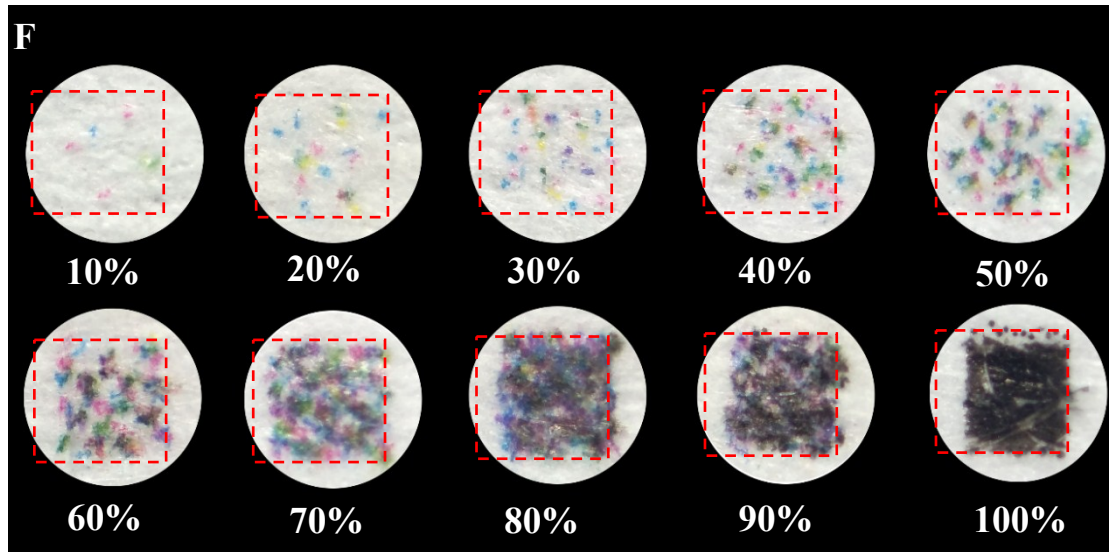

**Fig. S3** Parameters setting of CMYK in the regularity research of single color. The setting of K value in the grayscale printing (A) and CMYK mode (B). The setting of C (C), M (D) and Y (E) values in the CMYK mode. (F) Optical micrographs of the black ink dots in the CMYK mode at various K values.

**Figure S4**

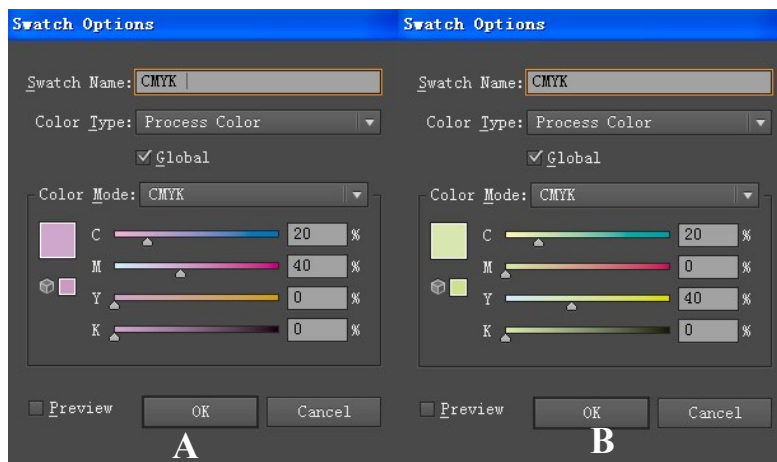

**Fig. S4** Parameters setting of CMYK in the regularity research of two-colors. (A) C-M pairs. (B) C-Ypairs.

**Figure S5**

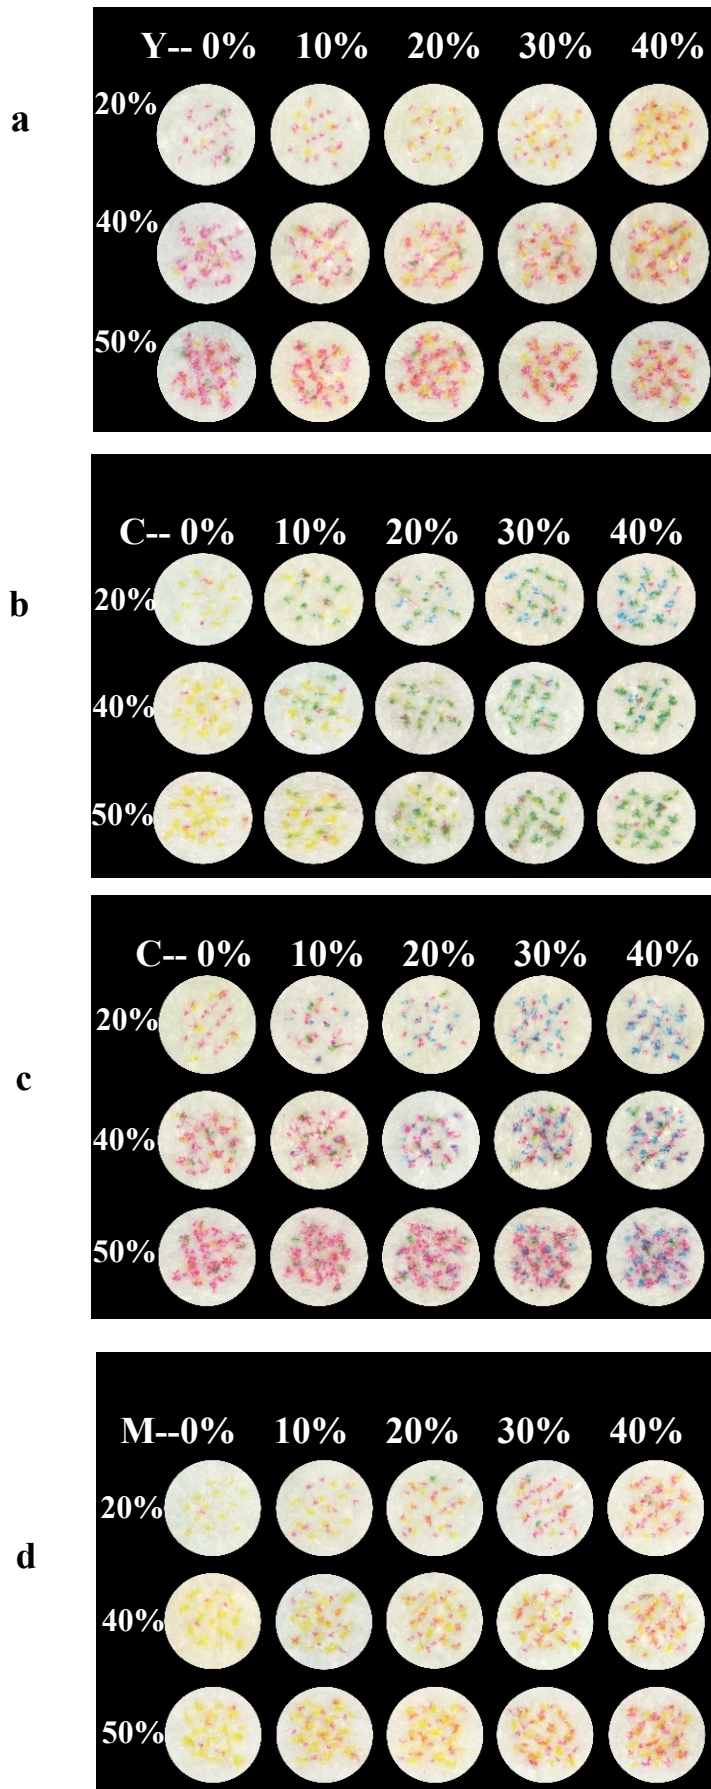



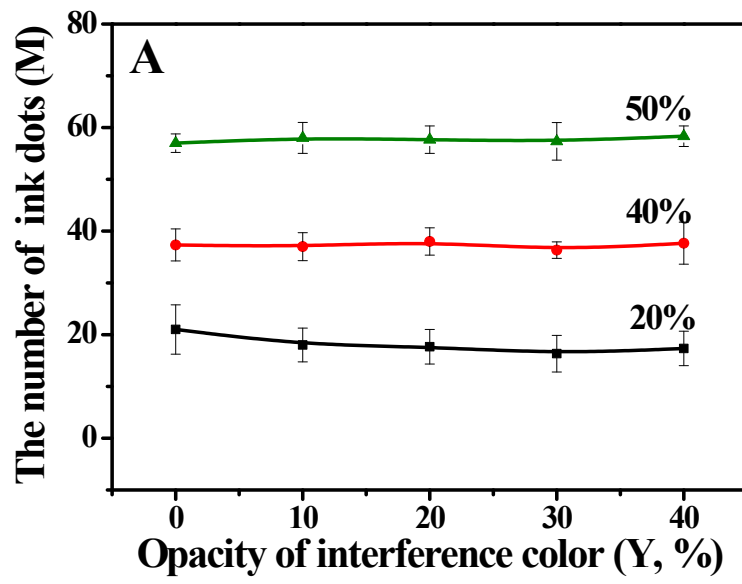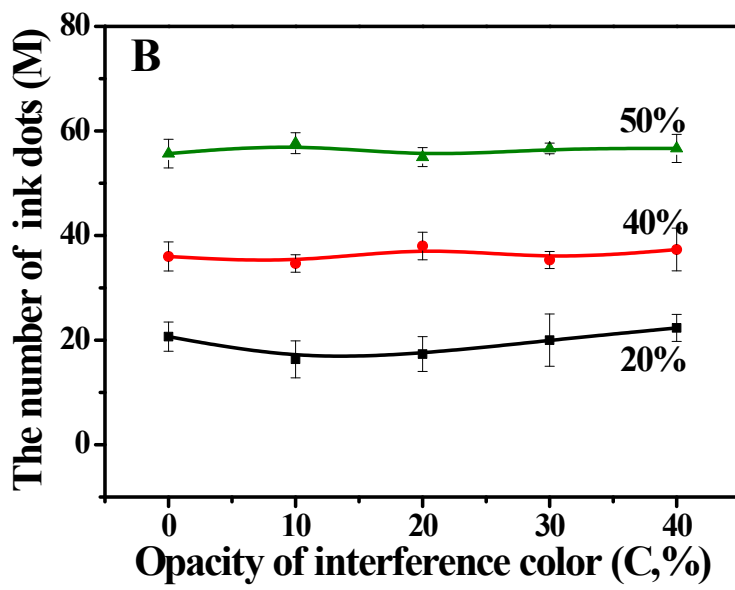

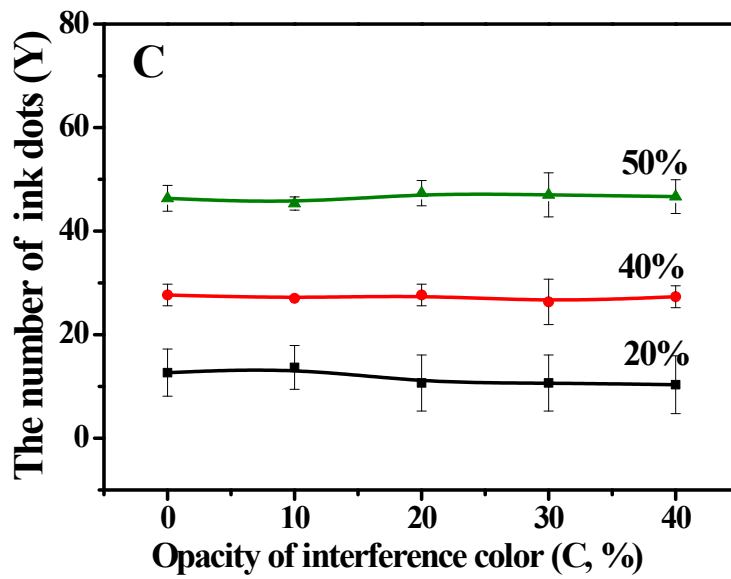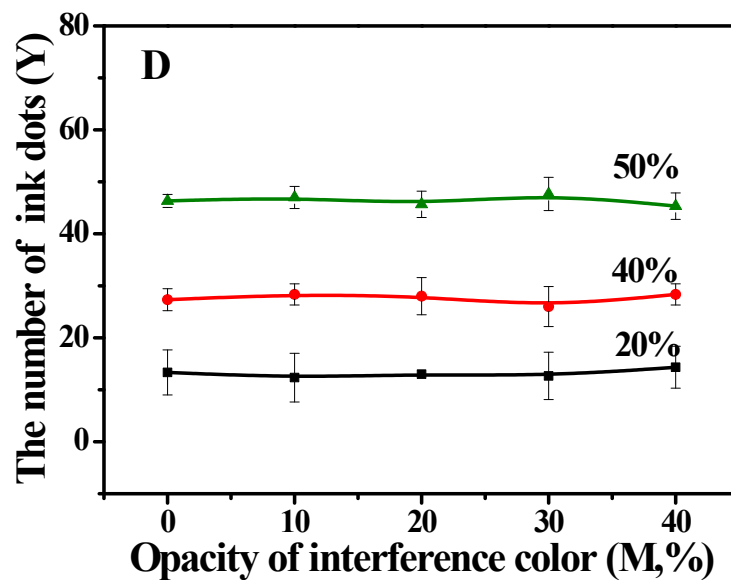

**Fig. S5** Regularity research of two-color. Optical micrographs of M-Y pairs (a), M-C pairs (b), Y-C pairs (c) and Y-M pairs (d) showing the number change of studied color ink dots at specific opacity value with the value of interference color. Effects of (A) Y value and (B) C value on the number change of the magenta ink dots. Effects of (C) C value and (D) M value on the number change of the yellow ink dots. Error bars represent the standard deviations for three replicates.

Figure S6

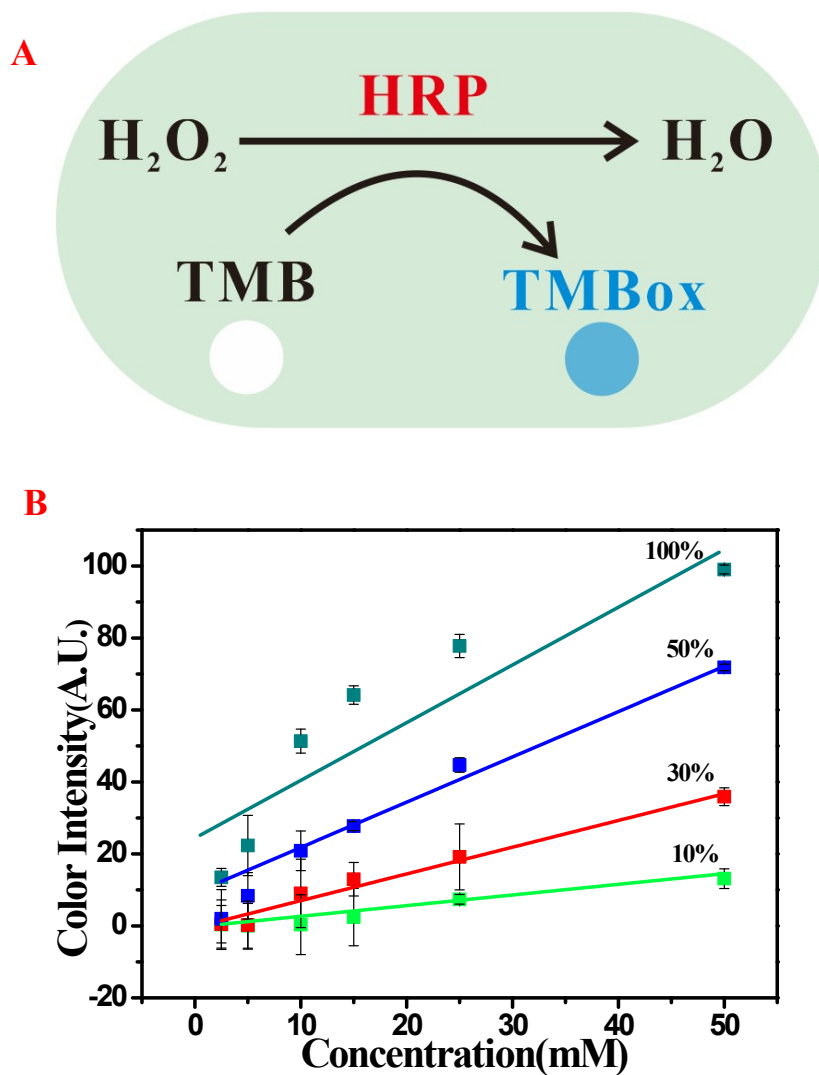

**Fig. S6** (A) Oxidation reaction catalyzed by HRP. (B) Linear relationship between color intensity and  $\text{H}_2\text{O}_2$  concentration at various K values (gray value: 10%, 30%, 50% and 100%).  $\text{H}_2\text{O}_2$  concentration: 2.5, 5, 10, 15, 25 and 50 mM. Error bars represent the standard deviations for three replicates.

**Figure S7**

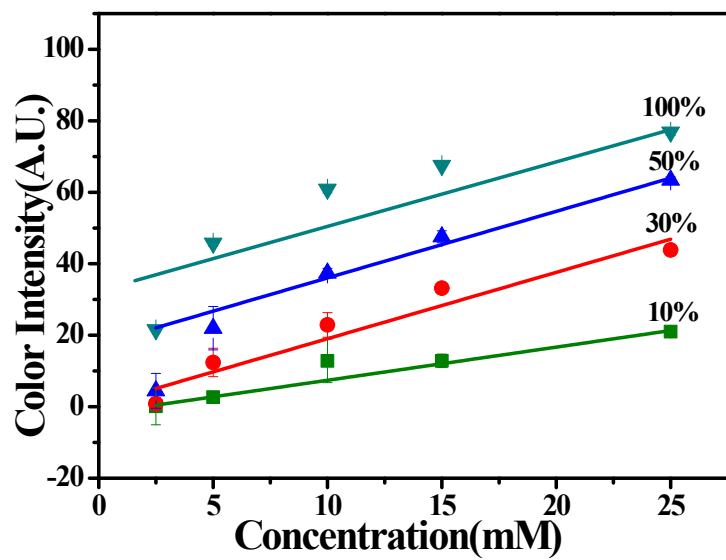

**Fig. S7** Linear relationship between color intensity and H<sub>2</sub>O<sub>2</sub> concentration at various C values (opacity value: 10%, 30%, 50% and 100%). H<sub>2</sub>O<sub>2</sub> concentration: 2.5, 5, 10, 15 and 25 mM. Error bars represent the standard deviations for three replicates.

**Table S1** Comparison of results for determination of glucose in real serum samples using the four ink cartridges printing approach and biochemical instrument.

| Serum samples | $\mu$ PADs( $\mu$ M) |        | Biochemical instrument IT3000 ( $\mu$ M) |
|---------------|----------------------|--------|------------------------------------------|
|               | Mean(n=5)            | RSD(%) |                                          |
| 1             | 3.433                | 5.366  | 3.60                                     |
| 2             | 5.571                | 2.337  | 5.11                                     |
| 3             | 11.049               | 1.970  | 10.50                                    |

**Table S2** Recovery tests of glucose in real serum samples based on four ink cartridges.

|               | Added ( $\mu$ mol) | Mean value ( $\mu$ mol) (n=3) | Recovery (%) | RSD (%) |
|---------------|--------------------|-------------------------------|--------------|---------|
|               | 0                  | 2.652                         | -            | -       |
| Serum samples | 2.5                | 5.391                         | 109.60       | 1.405   |
|               | 5                  | 7.442                         | 95.81        | 1.152   |
|               | 10                 | 13.627                        | 109.76       | 0.851   |
